# Supplementary material for: A recyclable carbon nanoparticle-based fluorescent probe for highly selective and sensitive detection of mercapto biomolecules
Source: Royal Society of Chemistry journal article supplement (doi:10.1039/c4tb01354a), 2014-10-27
Supplement: c4tb01354a1.pdf [file c4tb01354a1.pdf]

## Supporting Information

### A Recyclable Carbon Nanoparticles-Based Fluorescent Probe for Highly Selective and Sensitive Detection of Mercapto Biomolecules

Minhuan Lan, Jinfeng Zhang, Ying-San Chui, Hui Wang, Qingdan Yang, Xiaoyue Zhu, Huaixin Wei, Weimin Liu, Jiechao Ge, Pengfei Wang,\* Xianfeng Chen, Chun-Sing Lee, and Wenjun Zhang\*

Table S1. CNPs based fluorescence sensor toward thiols compounds.

| Methods                     | Response time | pH range        | PL Quenching efficiency | PL recovering efficiency | Circularity test | Ref.             |
|-----------------------------|---------------|-----------------|-------------------------|--------------------------|------------------|------------------|
| C-dots-Hg <sup>2+</sup>     | 5 min         | 7.5~9.5         | ~60%                    | ~30%                     | N/A              | [R1]             |
| C-dots-Au NPs               | 5 min         | N/A             | N/A                     | ~25%                     | N/A              | [R2]             |
| C-dots-Cu <sup>2+</sup>     | 1 min         | 5.0~6.0         | ~90%                    | ~80%                     | N/A              | [R3]             |
| GQDs-Hg <sup>2+</sup>       | N/A           | 7.0~7.4         | ~93%                    | ~95%                     | N/A              | [R4]             |
| GQDs-Ag NPs                 | 5 min         | 6.5~9.5         | ~40%                    | N/A                      | N/A              | [R5]             |
| <b>CNPs-Hg<sup>2+</sup></b> | <b>10 s</b>   | <b>5.0~10.0</b> | <b>98.7%</b>            | <b>93.2%</b>             | <b>10</b>        | <b>This work</b> |

[R1] L. Zhou, Y. H. Lin, Z. Z. Huang, J. S. Ren and X. G. Qu, *Chem. Commun.*, 2012, **48**, 1147.

[R2] Y. P. Shi, Y. Pan, H. Zhang, Z. M. Zhang, M. J. Li, C. Q. Yi and M. S. Yang, *Biosens. Bioelectron.*, 2014, **56**, 39.

[R3] H. Z. Zheng, W. J. Bai, Y. J. Long, M. Gao and L. Y. Zhang, *Scientia Sinica Chimica.*, 2011, **41**, 1031.

[R4] Z. Z. Wu, W. Y. Li, J. Chen and C. Yu, *Talanta*, 2014, **119**, 538.

[R5] X. Ran, H. J. Sun, F. Pu, J. S. Ren and X. G. Qu, *Chem. Commun.*, 2013, **49**, 1079.

Table S2. The influence of synthesis parameters on the properties of CNPs.

|        | Reaction temperature (°C) | Reaction time (h) | Citrate trisodium /Melamine | Quenching efficiency (%) | Recovering efficiency (%) | QY @330 nm | QY @340 nm | QY @350 nm |
|--------|---------------------------|-------------------|-----------------------------|--------------------------|---------------------------|------------|------------|------------|
| CNPs-A | 160                       | 12                | 2                           | 97.7                     | 77.8                      | 0.31       | 0.31       | 0.33       |
| CNPs-B | 180                       | 3                 | 2                           | 95.4                     | 73.1                      | 0.31       | 0.32       | 0.34       |
| CNPs-C | 180                       | 6                 | 2                           | 97.6                     | 74.5                      | 0.35       | 0.35       | 0.36       |
| CNPs-D | 180                       | 12                | 2                           | 98.7                     | 93.2                      | 0.30       | 0.31       | 0.34       |
| CNPs-E | 180                       | 24                | 2                           | 95.0                     | 91.1                      | 0.27       | 0.29       | 0.31       |
| CNPs-F | 180                       | 12                | 1                           | 97.6                     | 75.6                      | 0.33       | 0.35       | 0.36       |
| CNPs-G | 180                       | 12                | 0.5                         | 94.4                     | 81.8                      | 0.28       | 0.30       | 0.32       |

Data notes:

1. Quenching efficiency and recovering efficiency were calculated from the following equations:

$$\text{Quenching efficiency (\%)} = (I_0 - I_{\text{Hg}}) * 100 / I_0;$$

$$\text{Recovering efficiency (\%)} = I_{\text{Cys}} * 100 / I_0$$

where  $I_0$  is the PL intensity of CNPs at 437 nm in the absence of  $\text{Hg}^{2+}$  and Cys.  $I_{\text{Hg}}$  and  $I_{\text{Cys}}$  refer to the PL intensity of CNPs at 437 nm in the presence of 10  $\mu\text{M}$   $\text{Hg}^{2+}$  and 20  $\mu\text{M}$  Cys, respectively.

2. The QY was determined by the reference of quinine sulfate (QY = 0.54 when in 0.1 M  $\text{H}_2\text{SO}_4$  aqueous solution) at different excitation wavelengths (330, 340 and 350 nm).

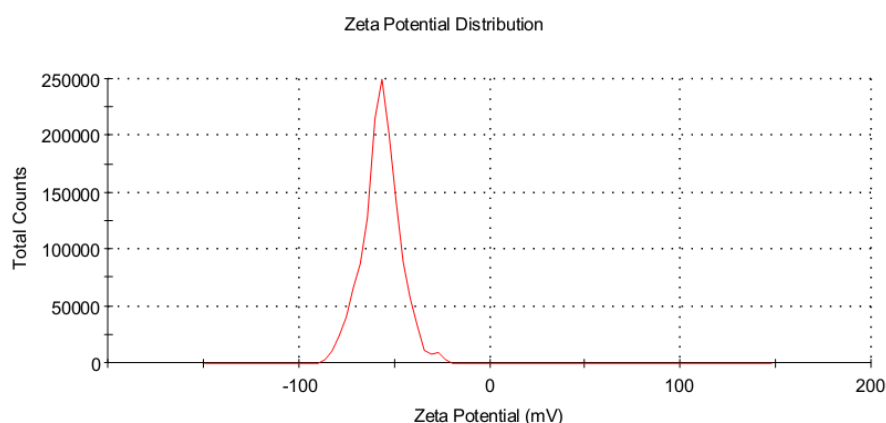

Fig. S1. Zeta-potential spectrum of CNPs.

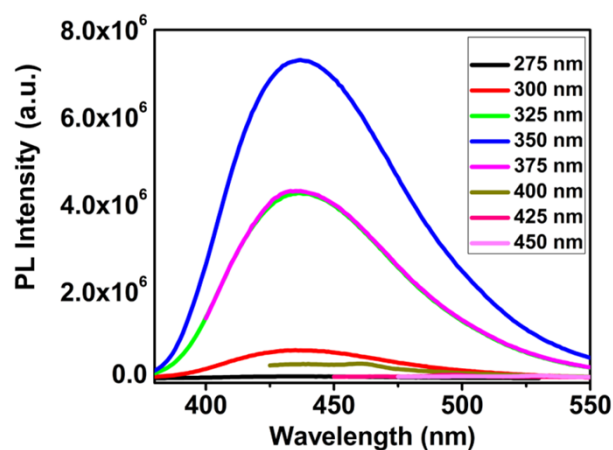

**Fig. S2.** PL spectra of CNPs aqueous solution under excitation with different wavelengths from 275 to 450 nm.

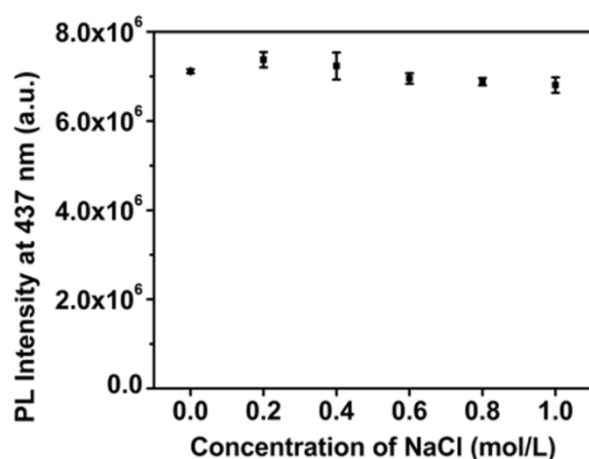

**Fig. S3.** The PL intensities of CNPs aqueous solution at 437 nm at different NaCl concentrations (0, 0.2, 0.4, 0.6, 0.8, 1.0 mol/L).

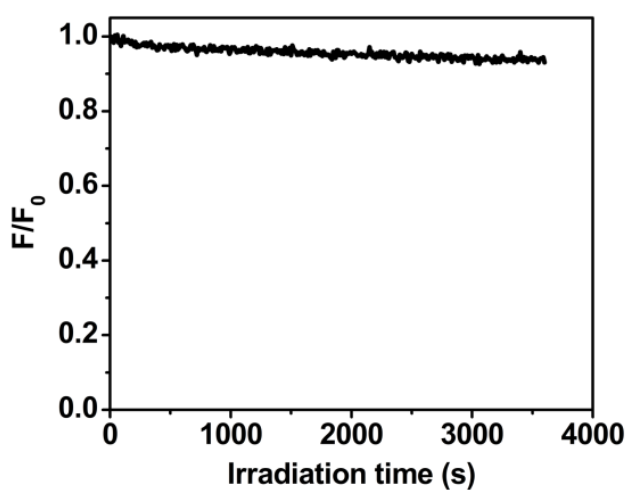

**Fig. S4.** Photostability of CNPs aqueous solution evaluated by the 350 nm xenon lamp equipped in the FL spectrometer.  $F_0$  and  $F$  represent the fluorescent intensity of CNPs at 437 nm before and after irradiation, respectively.

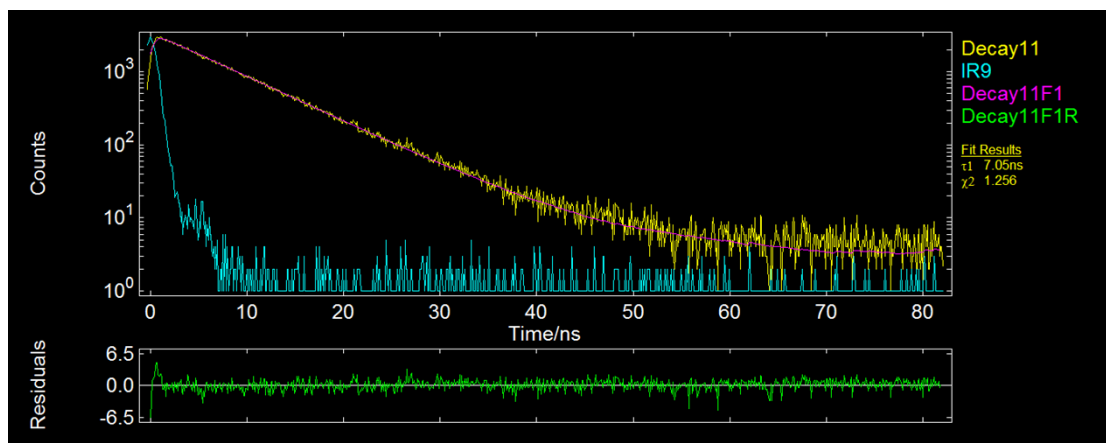

**Fig. S5.** Fluorescence decay curve (yellow line) of CNPs recorded at 437 nm with the excitation of 355 nm. Blue line: the instrument noise; and red line: fitting of the fluorescence decay curve. Fit =  $A+B_1\exp(-t/\tau_1)$ , ( $\tau_1=7.0$  ns).

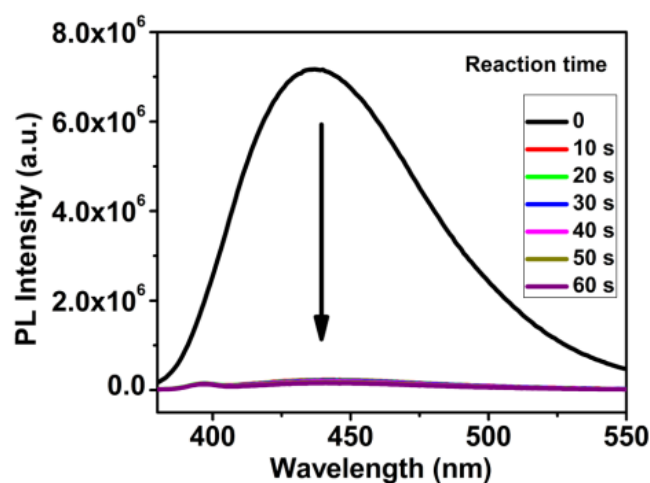

**Fig. S6.** Time-dependent PL spectra of CNPs upon addition of 10  $\mu\text{M}$   $\text{Hg}^{2+}$  in HEPES buffer solution at room temperature ( $\lambda_{\text{ex}}=350$  nm).

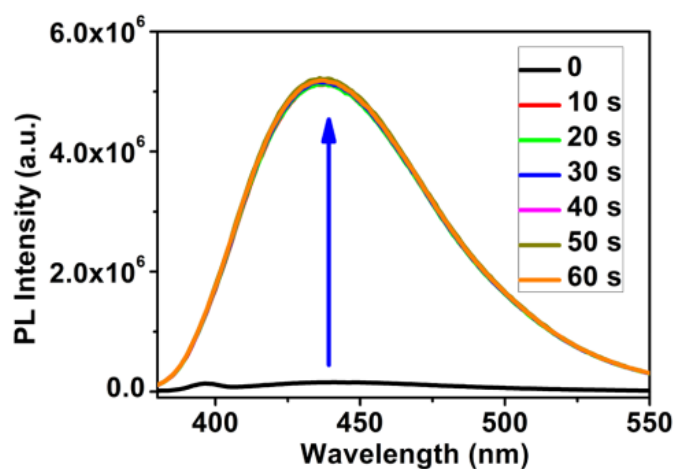

**Fig. S7.** Time-dependent PL spectra of CNPs- $\text{Hg}^{2+}$  system upon addition of 10  $\mu\text{M}$  Cys in HEPES buffer solution at room temperature ( $\lambda_{\text{ex}}=350$  nm).

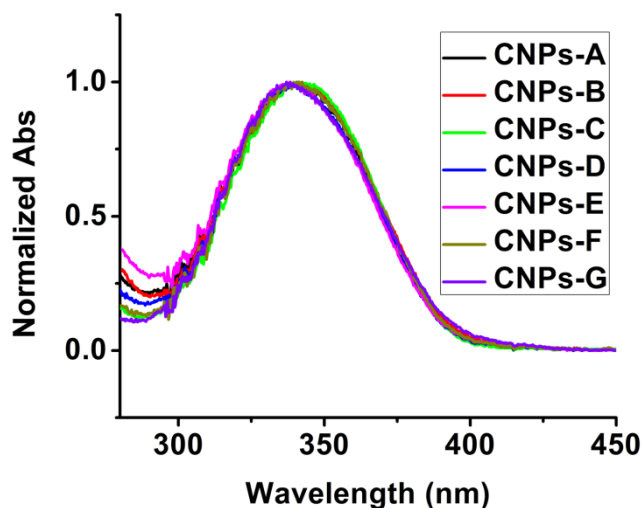

**Fig. S8.** Normalized UV-vis spectra of CNPs prepared under different conditions.

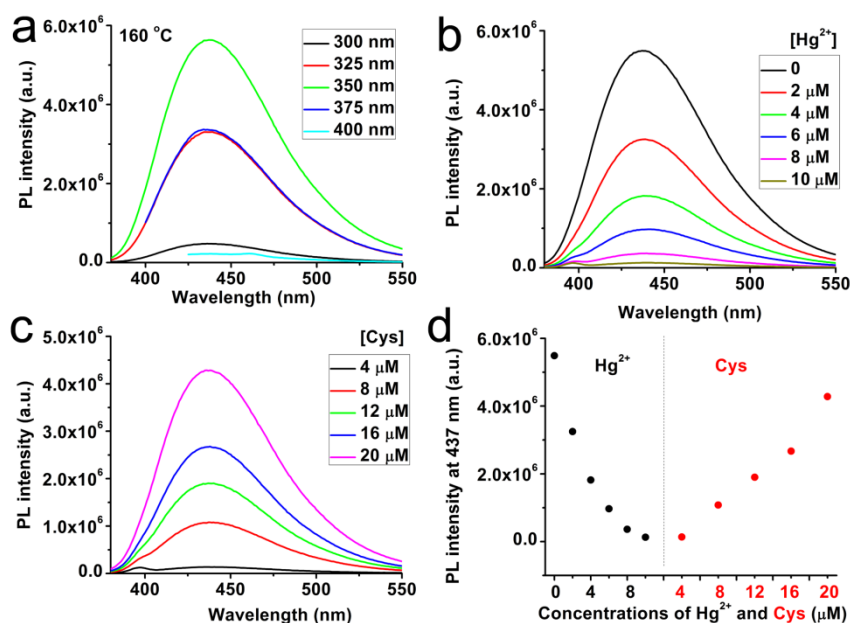

**Fig. S9A.** (a) PL spectra of CNPs-A aqueous solution under excitation with different wavelengths from 300 to 400 nm. (b) Dependence of PL spectra of CNPs-A in HEPES buffer solution (10 mM, pH 7.2) on the gradual addition of Hg<sup>2+</sup> from 0 to 10 μM and (c) following addition of Cys from 4 to 20 μM. ( $\lambda_{ex}$ =350 nm). (d) Dependence of PL intensity at 437 nm with incremental addition of Hg<sup>2+</sup> and Cys.

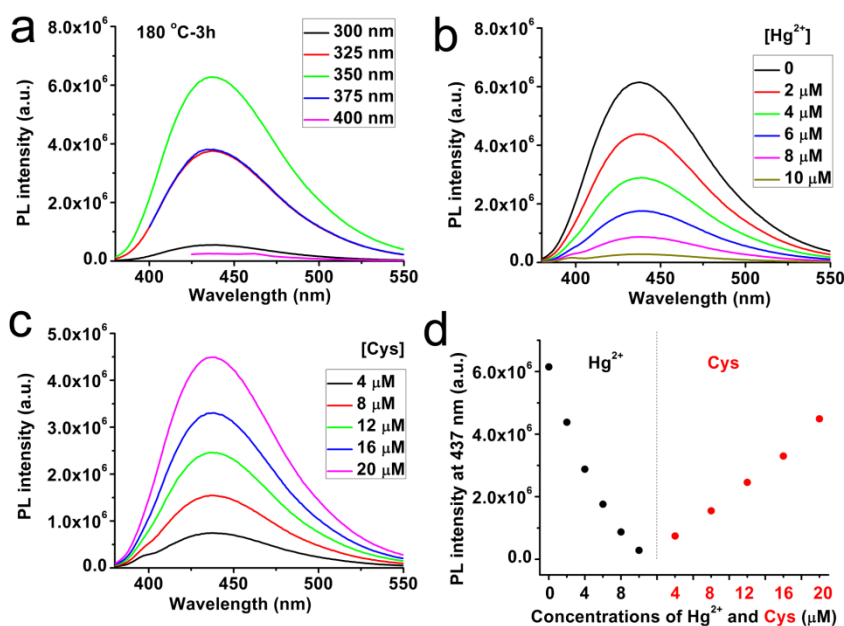

**Fig. S9B.** (a) PL spectra of CNPs-B aqueous solution under excitation with different wavelengths from 300 to 400 nm. (b) Dependence of PL spectra of CNPs-B in HEPES buffer solution (10 mM, pH 7.2) on the gradual addition of  $\text{Hg}^{2+}$  from 0 to 10  $\mu\text{M}$  and (c) following addition of Cys from 4 to 20  $\mu\text{M}$ . ( $\lambda_{\text{ex}}=350$  nm). (d) Dependence of PL intensity at 437 nm with incremental addition of  $\text{Hg}^{2+}$  and Cys.

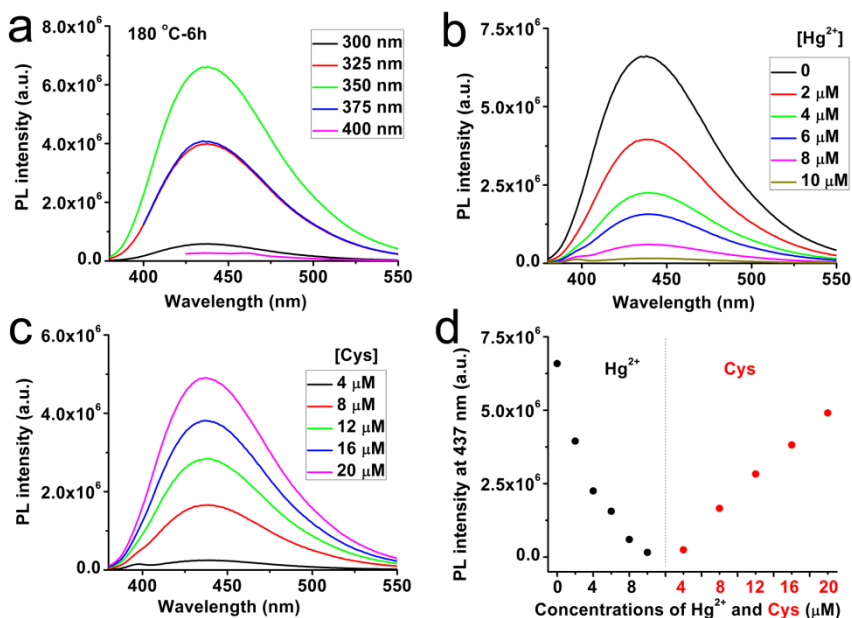

**Fig. S9C.** (a) PL spectra of CNPs-C aqueous solution under excitation with different wavelengths from 300 to 400 nm. (b) Dependence of PL spectra of CNPs-C in HEPES buffer solution (10 mM, pH 7.2) on the gradual addition of  $\text{Hg}^{2+}$  from 0 to 10  $\mu\text{M}$  and (c) following addition of Cys from 4 to 20  $\mu\text{M}$ . ( $\lambda_{\text{ex}}=350$  nm). (d) Dependence of PL intensity at 437 nm with incremental addition of  $\text{Hg}^{2+}$  and Cys.

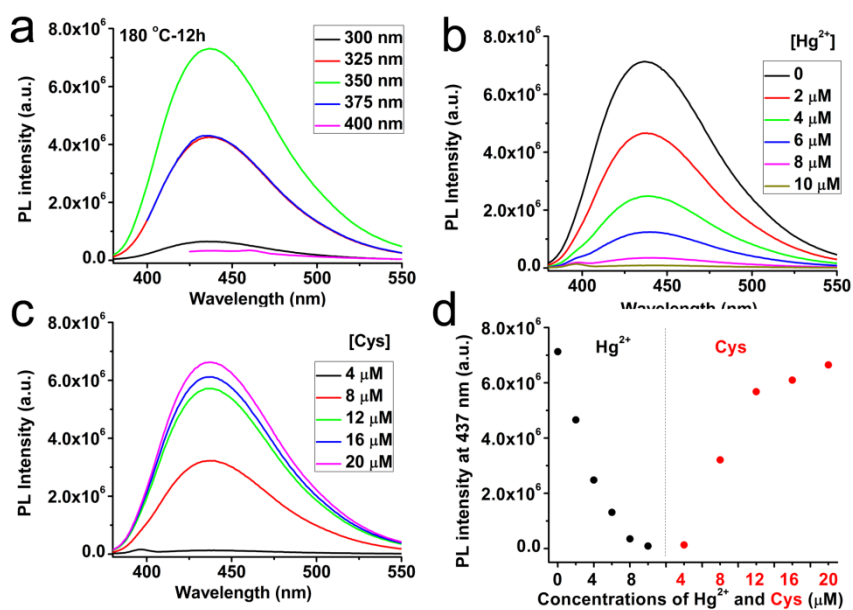

**Fig. S9D.** (a) PL spectra of CNPs-D aqueous solution under excitation with different wavelengths from 300 to 400 nm. (b) Dependence of PL spectra of CNPs-D in HEPES buffer solution (10 mM, pH 7.2) on the gradual addition of Hg<sup>2+</sup> from 0 to 10 μM and (c) following addition of Cys from 4 to 20 μM. ( $\lambda_{ex}$ =350 nm). (d) Dependence of PL intensity at 437 nm with incremental addition of Hg<sup>2+</sup> and Cys.

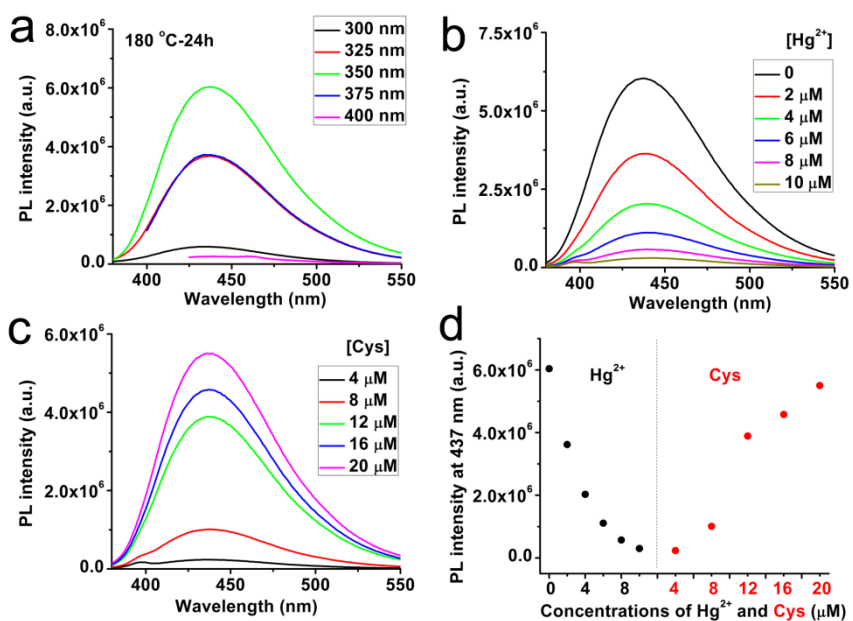

**Fig. S9E.** (a) PL spectra of CNPs-E aqueous solution under excitation with different wavelengths from 300 to 400 nm. (b) Dependence of PL spectra of CNPs-E in HEPES buffer solution (10 mM, pH 7.2) on the gradual addition of Hg<sup>2+</sup> from 0 to 10 μM and (c) following addition of Cys from 4 to 20 μM. ( $\lambda_{ex}$ =350 nm). (d) Dependence of PL intensity at 437 nm with incremental addition of Hg<sup>2+</sup> and Cys.

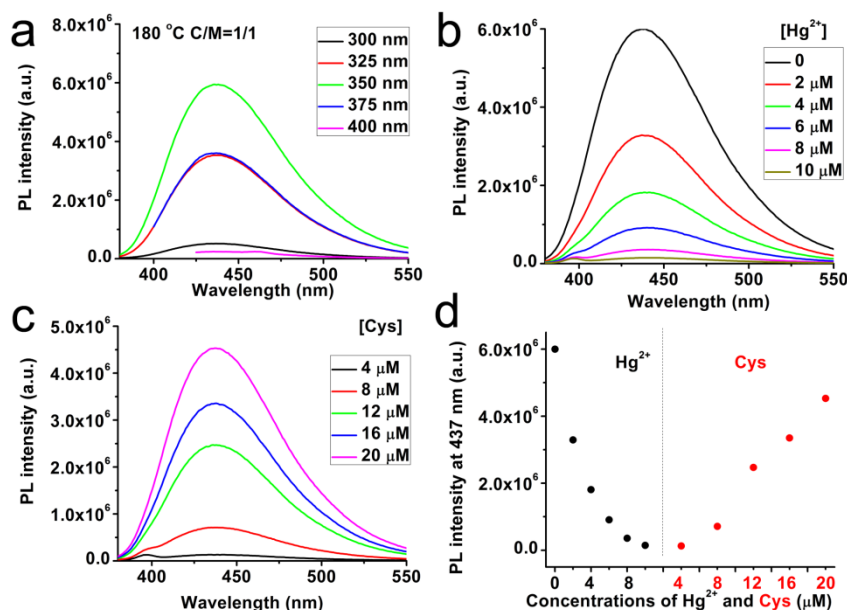

**Fig. S9F.** (a) PL spectra of CNPs-F aqueous solution under excitation with different wavelengths from 300 to 400 nm. (b) Dependence of PL spectra of CNPs-F in HEPES buffer solution (10 mM, pH 7.2) on the gradual addition of Hg<sup>2+</sup> from 0 to 10 μM and (c) following addition of Cys from 4 to 20 μM. ( $\lambda_{\text{ex}}$ =350 nm). (d) Dependence of PL intensity at 437 nm with incremental addition of Hg<sup>2+</sup> and Cys.

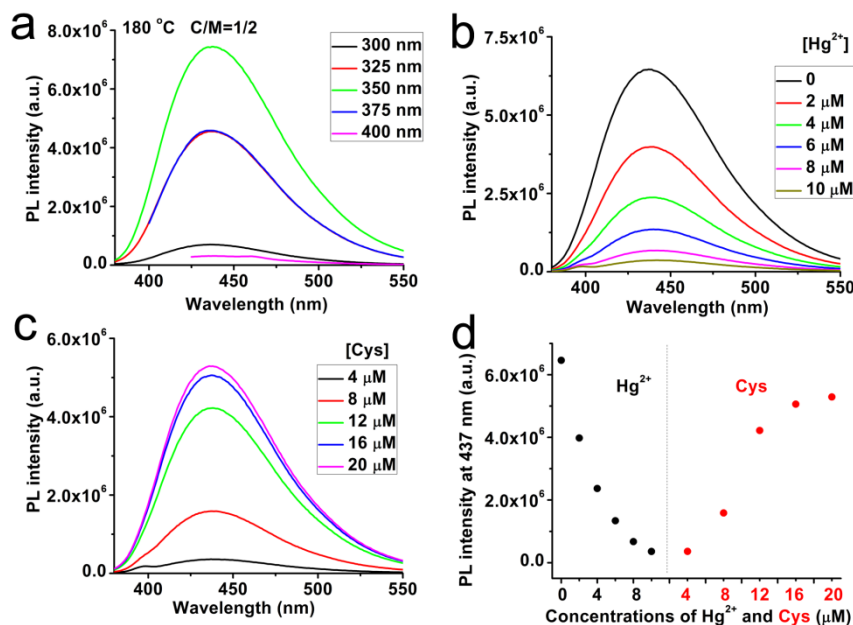

**Fig. S9G.** (a) PL spectra of CNPs-G aqueous solution under excitation with different wavelengths from 300 to 400 nm. (b) Dependence of PL spectra of CNPs-G in HEPES buffer solution (10 mM, pH 7.2) on the gradual addition of Hg<sup>2+</sup> from 0 to 10 μM and (c) following addition of Cys from 4 to 20 μM. ( $\lambda_{\text{ex}}$ =350 nm). (d) Dependence of PL intensity at 437 nm with incremental addition of Hg<sup>2+</sup> and Cys.

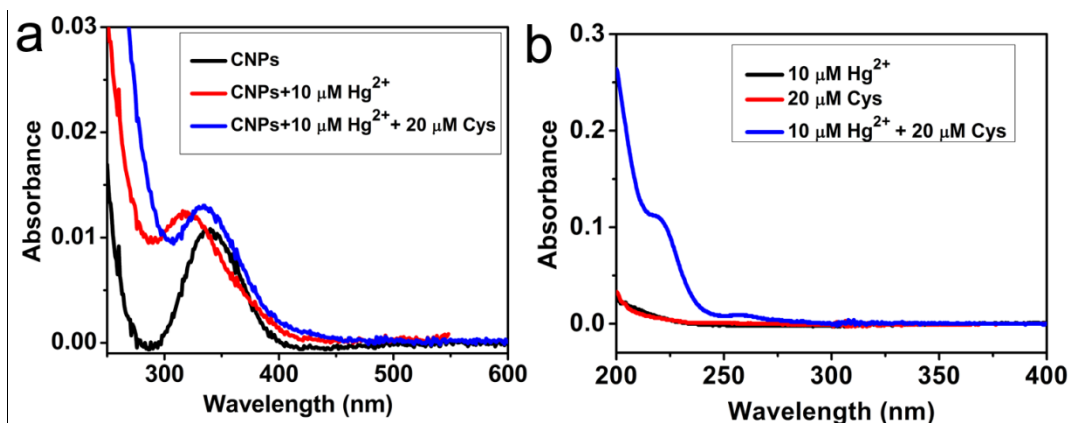

**Fig. S10.** (a) Absorption spectra of CNPs (black line), CNPs- $\text{Hg}^{2+}$  (red line) and CNPs- $\text{Hg}^{2+}$ -Cys mixture (blue line) in HEPES buffer solutions (10 mM, pH 7.2). (b) Absorption spectra of 10  $\mu\text{M}$   $\text{HgCl}_2$  (black line), 20  $\mu\text{M}$  Cys (red line) and the mixture of  $\text{HgCl}_2$  and Cys (blue line) in HEPES buffer solutions (10 mM, pH 7.2).

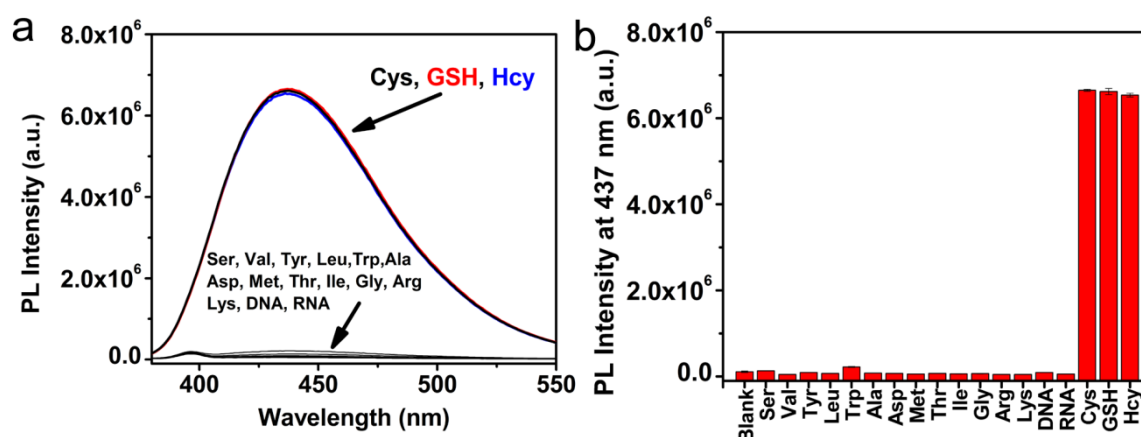

**Fig. S11.** (a) PL spectra and (b) the corresponding PL intensities at 437 nm of CNPs- $\text{Hg}^{2+}$  solutions with the addition of amino acids, DNA and RNA in HEPES buffer solution ( $\lambda_{\text{ex}}=350$  nm). The concentration of these analytes was 20  $\mu\text{M}$ .

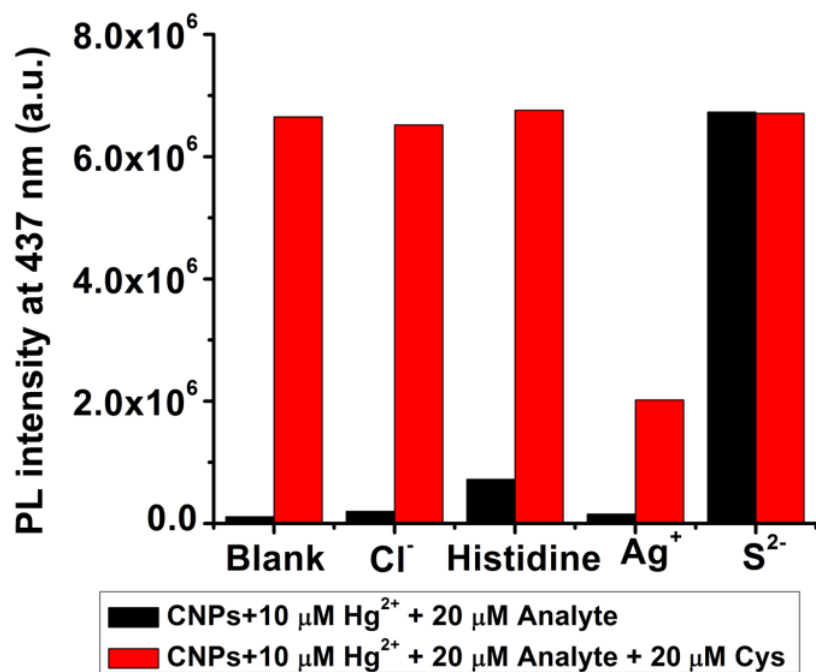

**Fig. S12.** Selectivity of CNPs- $\text{Hg}^{2+}$  system to Cys in the presence of 20  $\mu\text{M}$   $\text{Cl}^-$ , histidine,  $\text{Ag}^+$  and  $\text{S}^{2-}$  in HEPES buffer solution (10 mM, pH 7.2). Blank refer to the free CNPs- $\text{Hg}^{2+}$  aqueous solution.

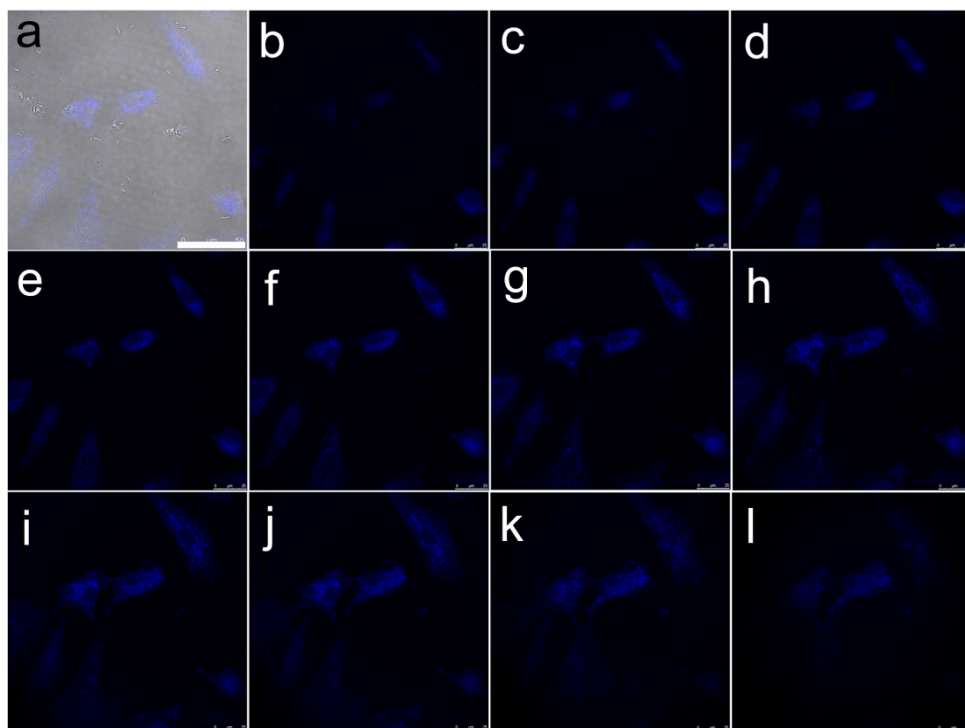

**Fig. S13.** Confocal laser scanning microscopy z-stack images of A549 cell incubated with CNPs ( $\lambda_{\text{ex}}=405$  nm). (a) The overlay of bright field and fluorescence images. (b)~(l) Z-stack scanning mode images from the top to the bottom of cells. The scale bar is 50  $\mu\text{m}$ .

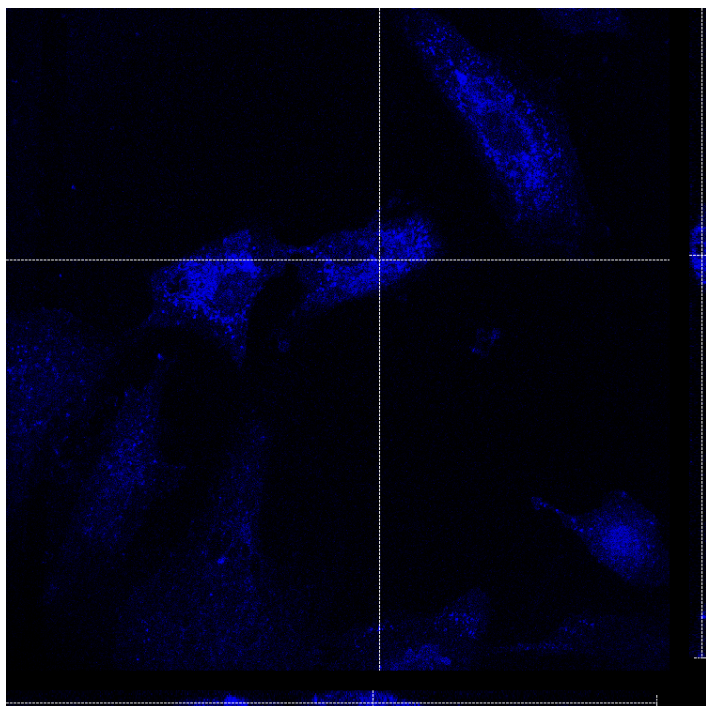

**Fig. S14.** Confocal microscopy images of multiple cross-sections exhibiting various locations of CNPs within A549 cells.
